# Supplementary material for: Leishmania mexicana Trypanothione Reductase Inhibitors: Computational and Biological Studies
Source: MDPI journal article supplement (doi:10.3390/molecules24183216), 2019-09-04
Supplement: s1 [file s1]

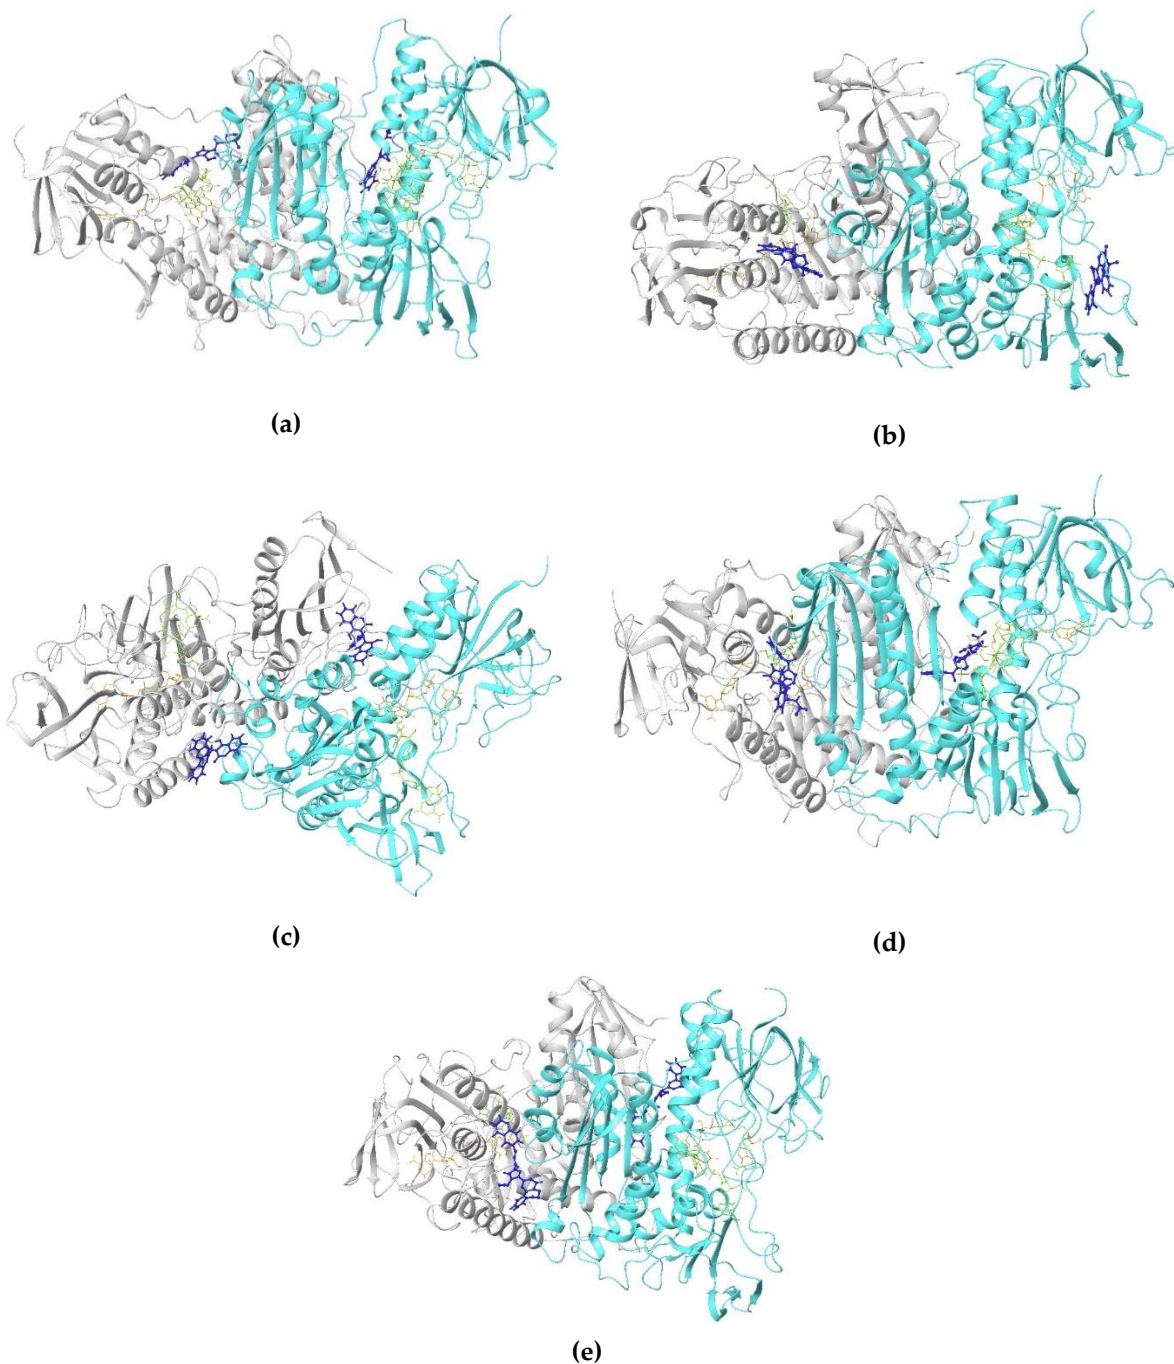

**Figure S1.** LmTR in complex with ZINC14970552 (a), ZINC09642432 (b), ZINC04684558 (c), ZINC11841871 (d) and ZINC12151998 (e). The LmTR monomers A and B are represented with gray ribbons and cyan ribbons, respectively. The ligands are represented in blue sticks FAD and NADH are represented in thin sticks yellow and green, respectively.
